# Supplementary material for: Mycalamide A Shows Cytotoxic Properties and Prevents EGF-Induced Neoplastic Transformation through Inhibition of Nuclear Factors
Source: MDPI journal article supplement (doi:10.3390/md10061212), 2012-05-30

## Supplementary Materials

Table 1. Description of antibodies

Figure 1. Effect of mycalamide A on cell viability of HeLa cells, detected by the cytotoxicity assay (MTS test)

Figure 2A.  $^1\text{H}$  NMR spectrum of mycalamide A in  $\text{CD}_3\text{OD}$  (0–6.0 ppm)

Figure 2B.  $^1\text{H}$  NMR spectrum of mycalamide A in  $\text{CD}_3\text{OD}$  (crop 0–1.8 ppm)

Figure 2C.  $^1\text{H}$  NMR spectrum of mycalamide A in  $\text{CD}_3\text{OD}$  (crop 1.8–2.7 ppm)

Figure 2D.  $^1\text{H}$  NMR spectrum of mycalamide A in  $\text{CD}_3\text{OD}$  (crop 3.0–4.0 ppm)

Figure 2E.  $^1\text{H}$  NMR spectrum of mycalamide A in  $\text{CD}_3\text{OD}$  (crop 4.0–4.9 ppm)

Figure 2F.  $^1\text{H}$  NMR spectrum of mycalamide A in  $\text{CD}_3\text{OD}$  (crop 5.0–6.0 ppm)

Figure 3.  $^{13}\text{C}$  NMR spectrum of mycalamide A in  $\text{DMSO-}d_6$

**Table 1.** Description of antibodies.

| Antibodies              | Clonality | Source | Cat.-No. | Dilution Used | Manufacturer   |
|-------------------------|-----------|--------|----------|---------------|----------------|
| anti- $\alpha$ -Tubulin | mAb       | mouse  | T5168    | 1:5000        | Sigma-Aldrich  |
| anti- $\beta$ -actin    | mAb       | mouse  | CP01     | 1:10000       | Calbiochem     |
| anti-caspase-3          | mAb       | rabbit | #9665    | 1:1000        | Cell Signaling |
| anti-ERK                | mAb       | mouse  | #9107    | 1:2000        | Cell Signaling |
| anti-JNK                | mAb       | rabbit | #9258    | 1:1000        | Cell Signaling |
| anti-p38                | mAb       | rabbit | #9212    | 1:1000        | Cell Signaling |
| anti-phospho-ERK        | mAb       | rabbit | #4377    | 1:1000        | Cell Signaling |
| anti-phospho-JNK        | mAb       | rabbit | #4668    | 1:1000        | Cell Signaling |
| anti-phospho-p38        | mAb       | rabbit | #4511    | 1:1000        | Cell Signaling |
| anti-mouse IgG-HRP      |           | sheep  | NXA931   | 1:10000       | GE Healthcare  |
| anti-rabbit IgG-HRP     |           | goat   | #7074    | 1:5000        | Cell Signaling |

**Figure 1.** Cell viability of HeLa cells under treatment with different concentrations of mycalamide A. Cytotoxicity was determined using the MTS method. Statistically significant differences (determined by *t*-test) between treated and control cells are indicated as follows: \*\*  $p < 0.01$ , \*\*\*  $p < 0.005$ .

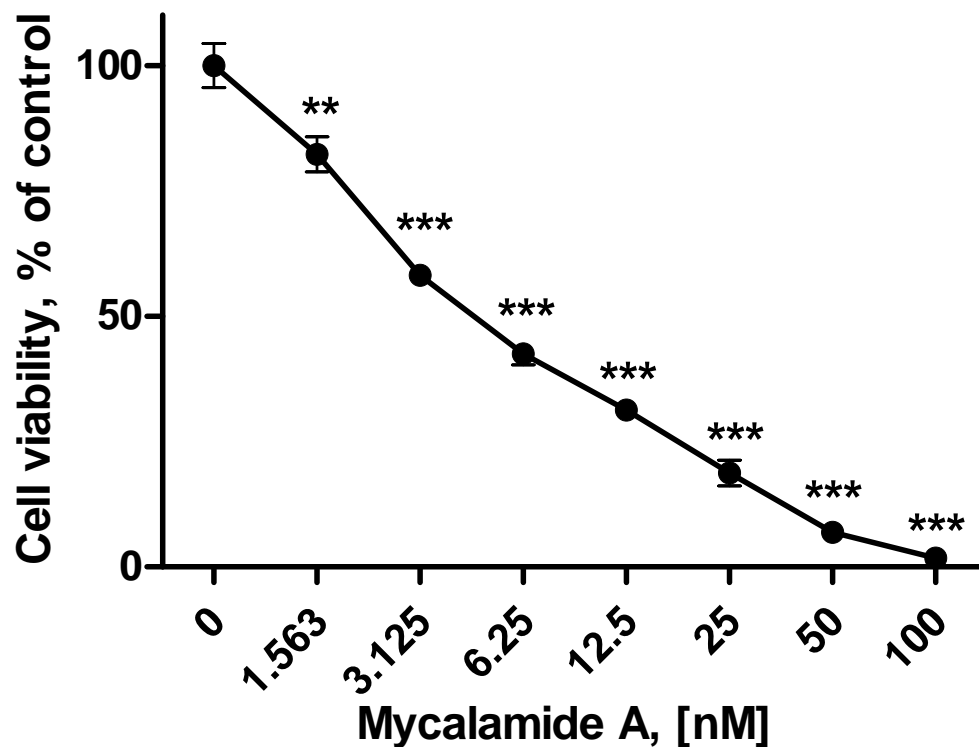

**Figure 2A.**  $^1\text{H}$  NMR spectrum of mycalamide A in  $\text{CD}_3\text{OD}$  (0–6.0 ppm).

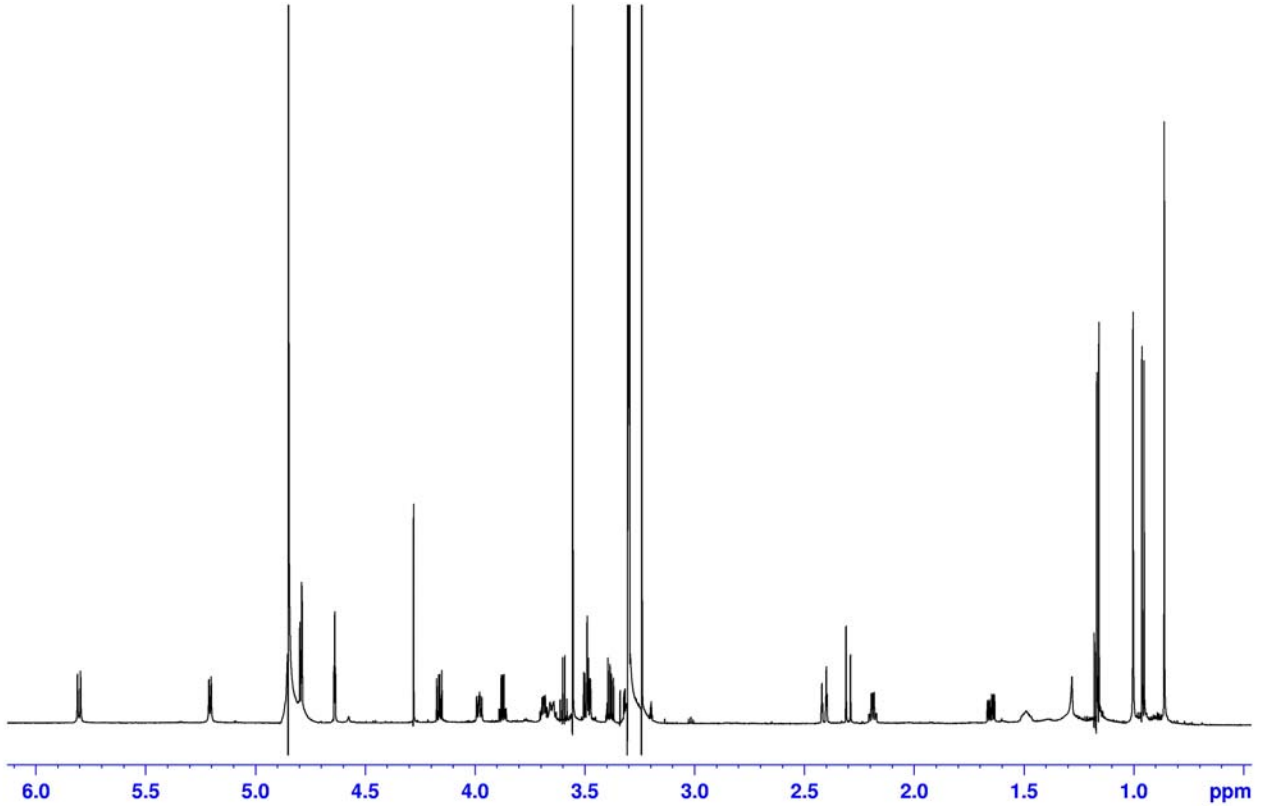

**Figure 2B.**  $^1\text{H}$  NMR spectrum of mycalamide A in  $\text{CD}_3\text{OD}$  (crop 0–1.8 ppm).

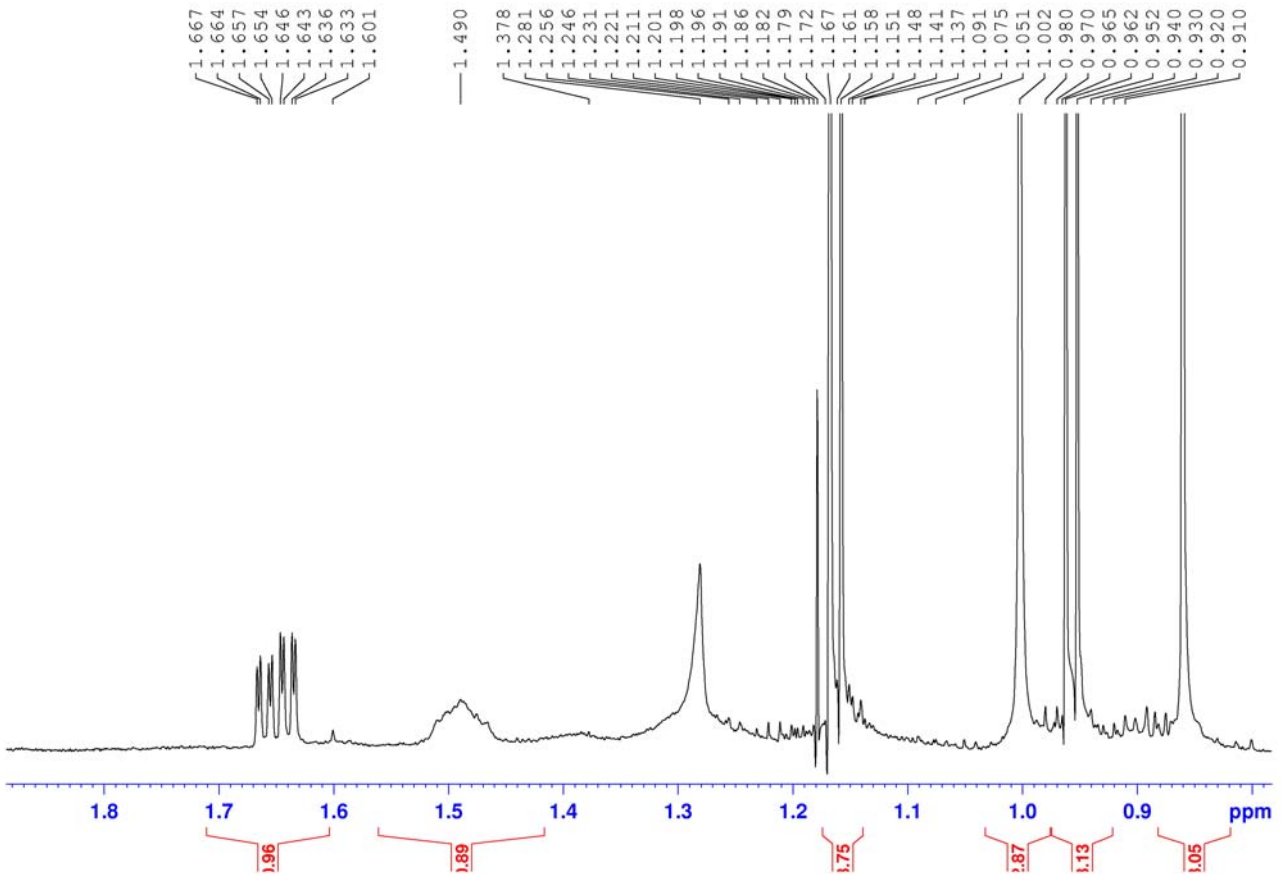

**Figure 2C.**  $^1\text{H}$  NMR spectrum of mycalamide A in  $\text{CD}_3\text{OD}$  (crop 1.8–2.7 ppm).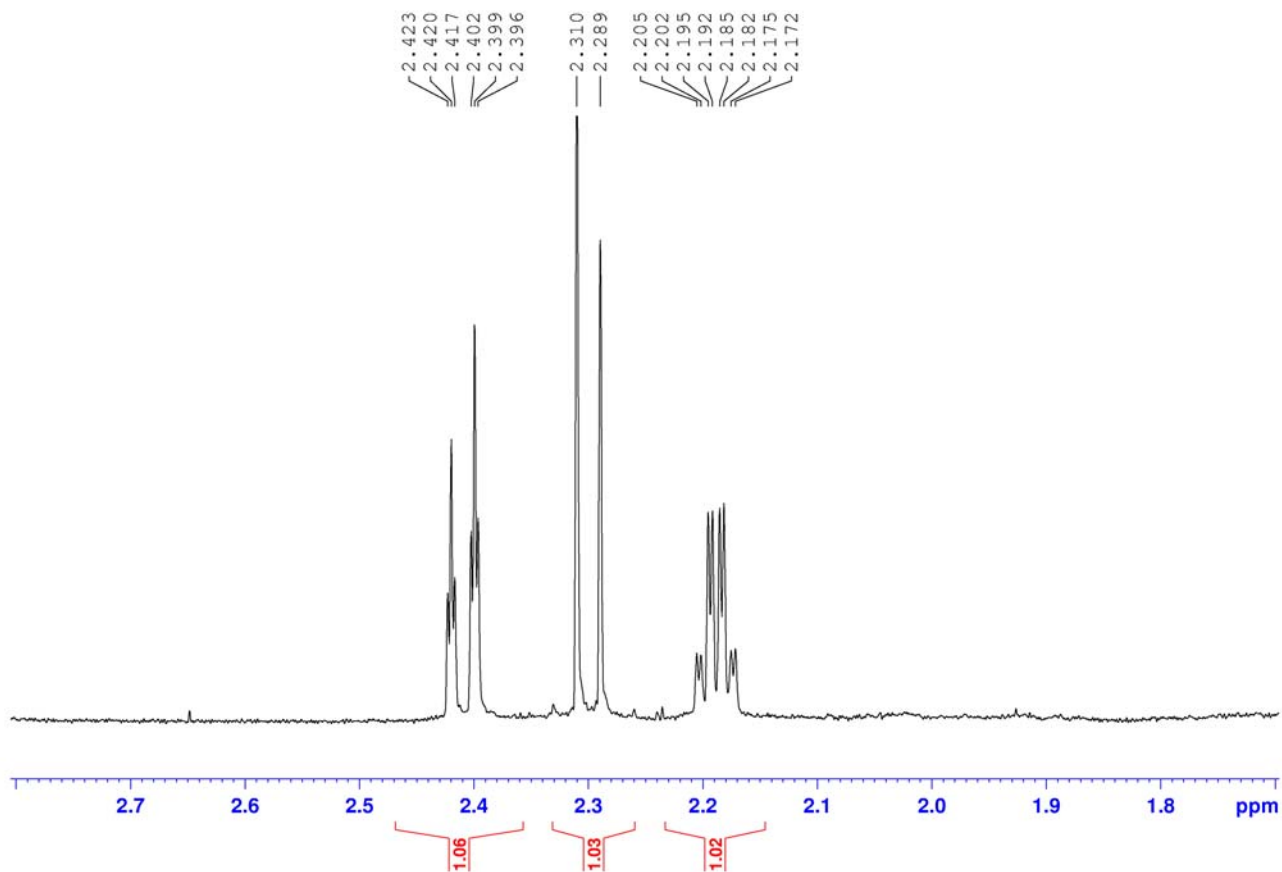**Figure 2D.**  $^1\text{H}$  NMR spectrum of mycalamide A in  $\text{CD}_3\text{OD}$  (crop 3.0–4.0 ppm).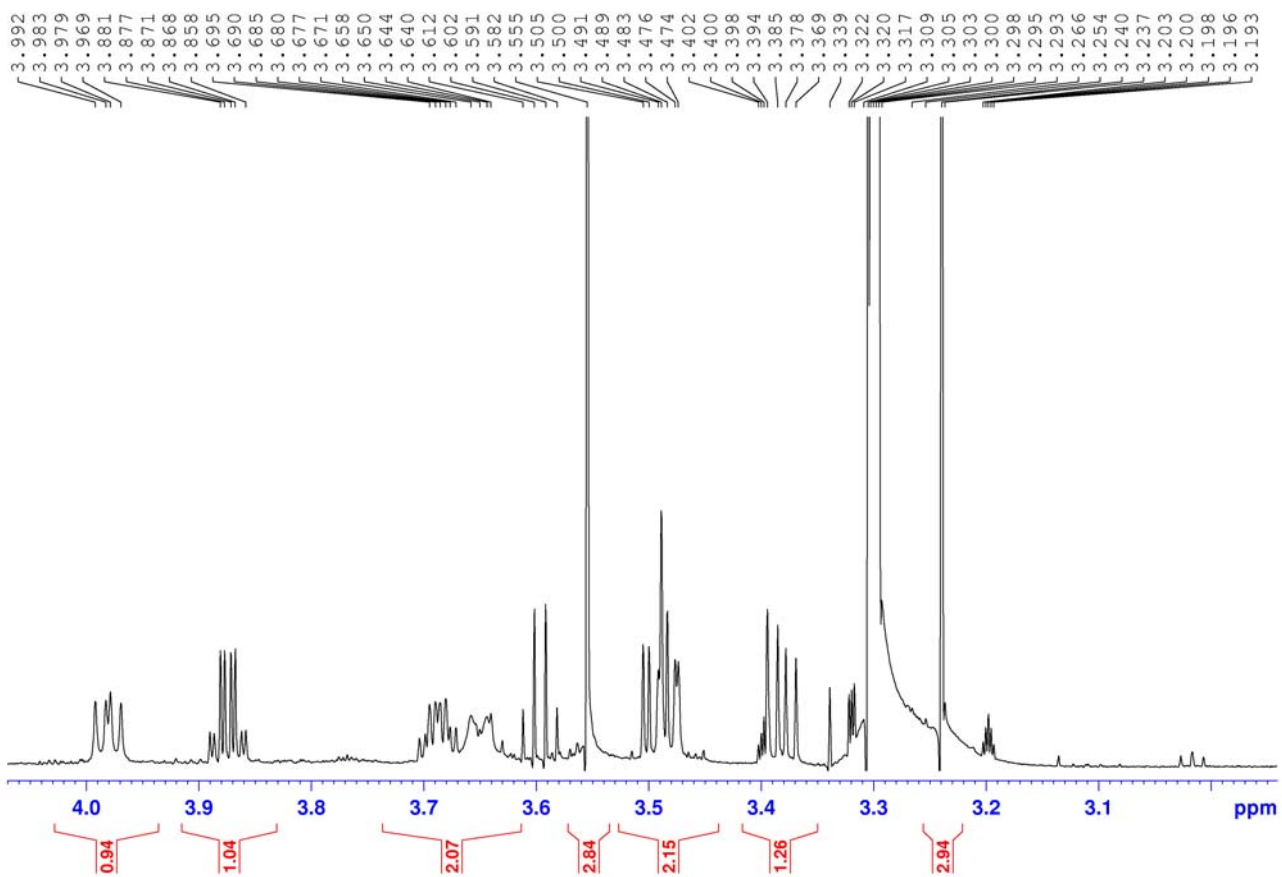

**Figure 2E.**  $^1\text{H}$  NMR spectrum of mycalamide A in  $\text{CD}_3\text{OD}$  (crop 4.0–4.9 ppm).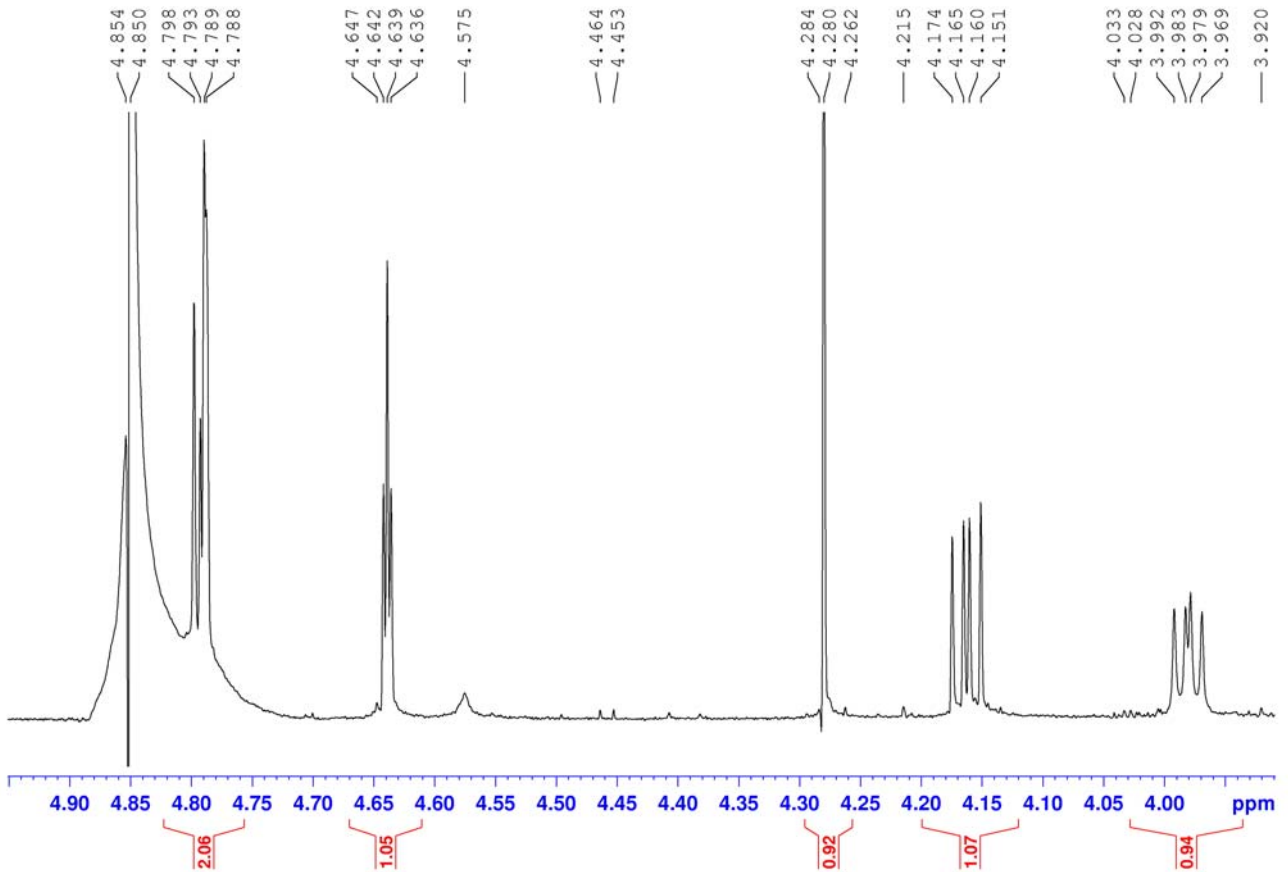**Figure 2F.**  $^1\text{H}$  NMR spectrum of mycalamide A in  $\text{CD}_3\text{OD}$  (crop 5.0–6.0 ppm).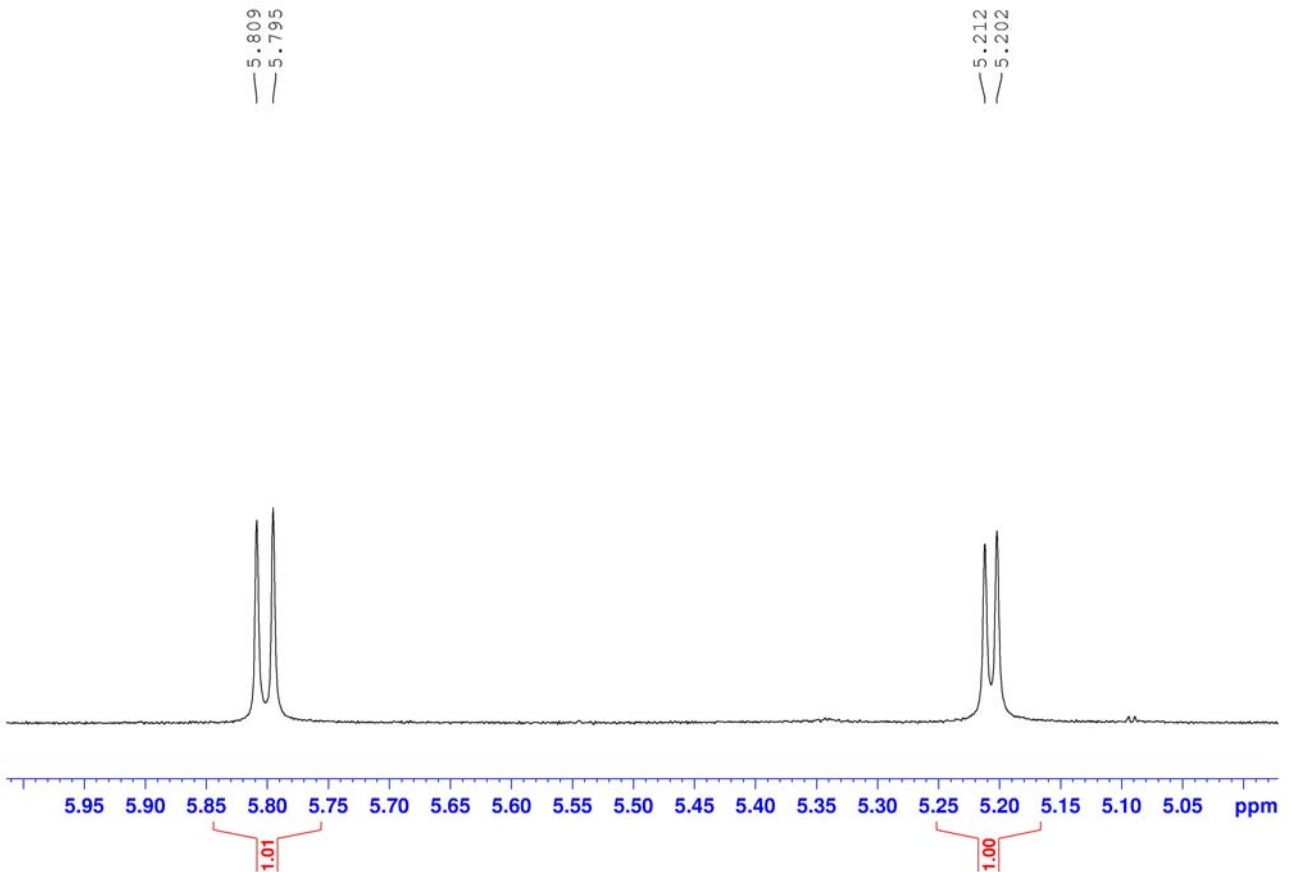

Figure 3. <sup>13</sup>C NMR spectrum of mycalamide A in DMSO-d<sub>6</sub>.

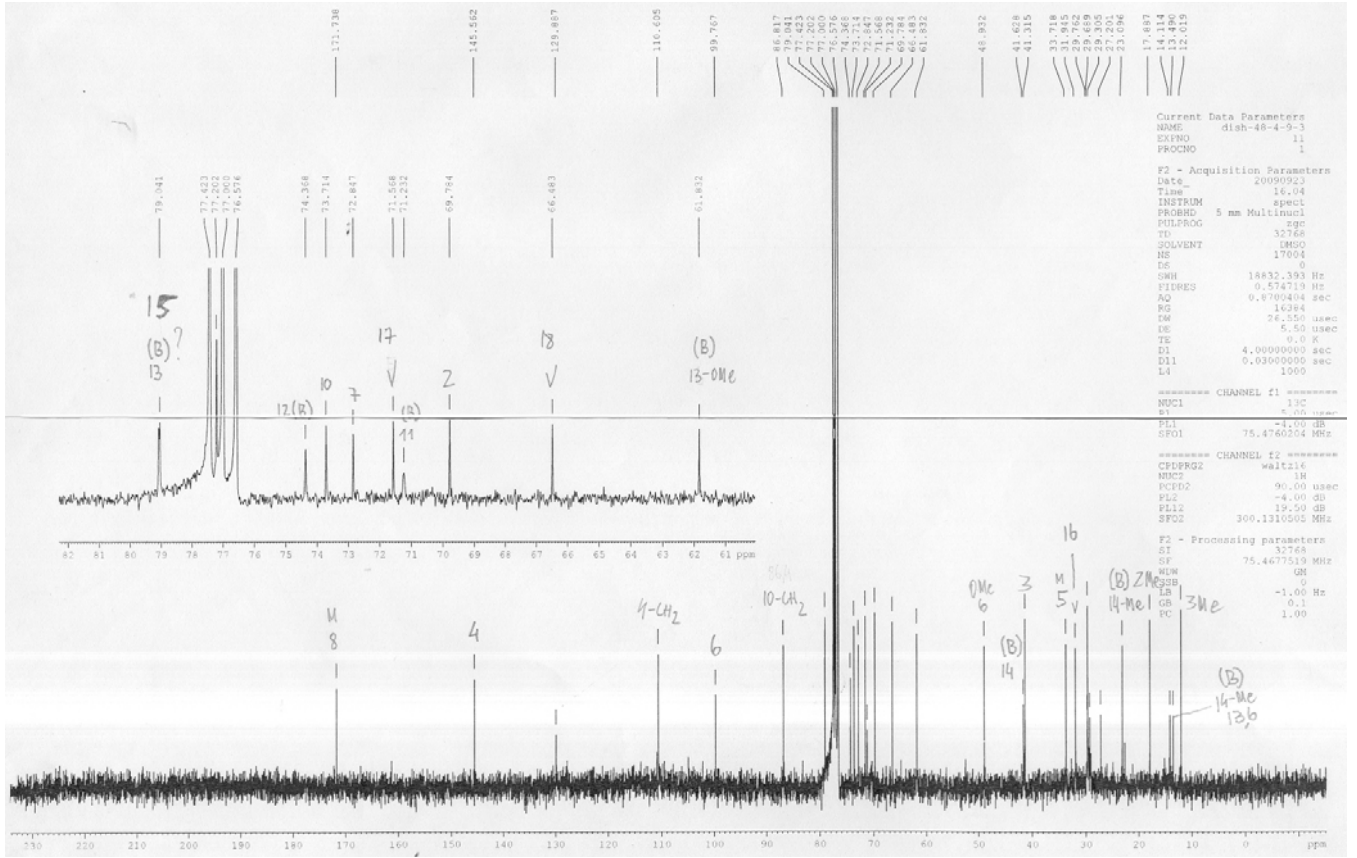

Supplement: s1 [file s1]
